# Supplementary material for: Interlaboratory proficiency processing scheme in CSF aliquoting: implementation and assessment based on biomarkers of Alzheimer’s disease
Source: PubMed Central journal article supplement (PMC6114189; doi:10.1186/s13195-018-0418-3), 2018-08-28

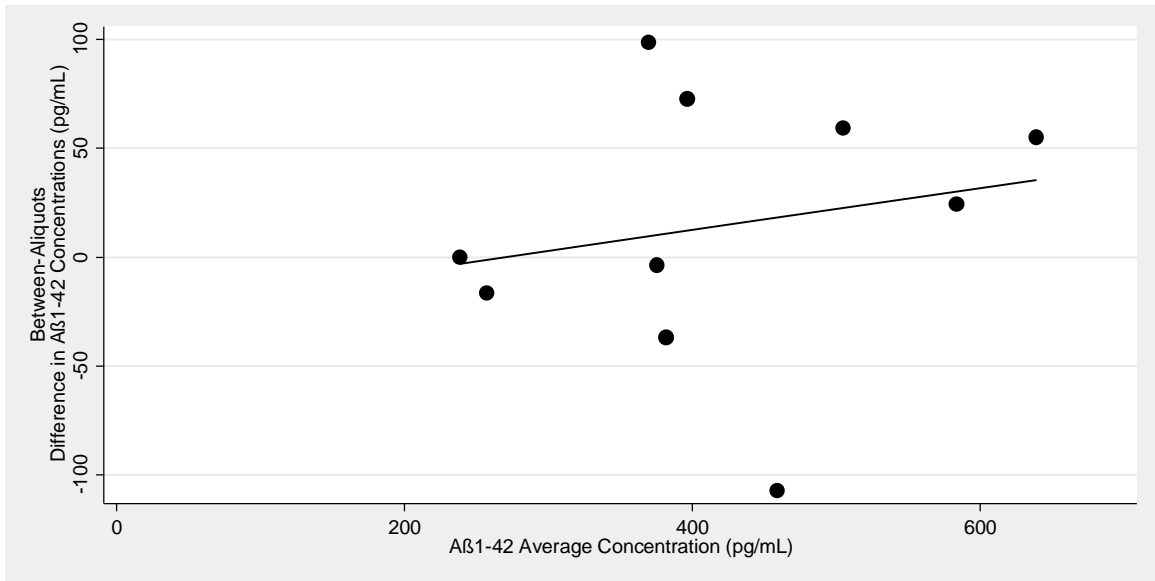

Supplement: 13195_2018_418_MOESM2_ESM.pdf [file 13195_2018_418_MOESM2_ESM.pdf]
